# Supplementary material
Source: PubMed Central journal article supplement (PMC6028632)
Supplement: 41422_2018_38_MOESM1_ESM.pdf [file 41422_2018_38_MOESM1_ESM.pdf]

**Table S1: EC<sub>50</sub> of OAG and IC<sub>50</sub> of Inhibitor on hTRPC6 constructs**

| TRPC6 constructs                | OAG                              |                       | Inhibitor                        |                       |
|---------------------------------|----------------------------------|-----------------------|----------------------------------|-----------------------|
|                                 | LogEC <sub>50</sub> <sup>a</sup> | EC <sub>50</sub> (nM) | LogIC <sub>50</sub> <sup>a</sup> | IC <sub>50</sub> (nM) |
| TRPC6 WT                        | 3.43 ± 0.06                      | 2,707                 | 1.01 ± 0.07                      | 10                    |
| TRPC6 NGFP                      | 3.28 ± 0.08                      | 1,925                 | 1.20 ± 0.07                      | 16                    |
| <b>Mutations in CHS</b>         |                                  |                       |                                  |                       |
| <b>binding pocket</b>           |                                  |                       |                                  |                       |
| Y392F                           | 3.32 ± 0.09                      | 2,100                 | 1.26 ± 0.11                      | 18                    |
| A404C                           | 3.41 ± 0.07                      | 2,589                 | 1.30 ± 0.10                      | 20                    |
| F407A                           | 3.25 ± 0.06                      | 1,774                 | 1.13 ± 0.07                      | 13                    |
| L408M                           | 3.38 ± 0.09                      | 2,377                 | 1.18 ± 0.07                      | 15                    |
| L411F                           | 3.40 ± 0.14                      | 2,494                 | 1.35 ± 0.11                      | 23                    |
| A447T                           | 4.02 ± 0.08                      | 10,481                | 1.07 ± 0.08                      | 12                    |
| A447F                           | 3.25 ± 0.05                      | 1,779                 | 1.76 ± 0.13                      | 57                    |
| T451F                           | 3.75 ± 0.09                      | 5,684                 | 1.19 ± 0.09                      | 16                    |
| T451L                           | 3.29 ± 0.05                      | 1,944                 | 1.35 ± 0.13                      | 22                    |
| N617S                           | 3.81 ± 0.10                      | 6,406                 | 0.6 ± 0.08                       | 4                     |
| F620L                           | 3.09 ± 0.11                      | 1,227                 | 0.79 ± 0.08                      | 6                     |
| <b>Mutations in BTDM</b>        |                                  |                       |                                  |                       |
| <b>binding pocket</b>           |                                  |                       |                                  |                       |
| W526A                           | 2.93 ± 0.06                      | 850                   | 2.00 ± 0.14                      | 100                   |
| S608L                           | 2.51 ± 0.07                      | 326                   | -                                | >10,000 <sup>b</sup>  |
| Q624A                           | 3.70 ± 0.07                      | 4,990                 | 3.39 ± 0.16                      | 2,463                 |
| I640F                           | 4.07 ± 0.13                      | 11,709                | 1.62 ± 0.14                      | 42                    |
| V644F                           | 2.93 ± 0.03                      | 857                   | -                                | >10,000 <sup>b</sup>  |
| T714F                           | 3.17 ± 0.10                      | 1,463                 | 3.93 ± 0.17                      | 8,430                 |
| <b>Gain of function mutants</b> |                                  |                       |                                  |                       |
| P112Q                           | 3.32 ± 0.69                      | 2,090                 | 1.15 ± 0.07                      | 14                    |
| R895C                           | 3.27 ± 0.09                      | 1,852                 | 1.22 ± 0.09                      | 17                    |
| E897K                           | 3.48 ± 0.08                      | 2,993                 | 0.97 ± 0.12                      | 9                     |

<sup>a</sup>Data were expressed as logEC<sub>50</sub> ( or logIC<sub>50</sub>) ± SEM, n=3.

<sup>b</sup>The highest inhibitor concentration (10,000 nM) inhibited the activation of TRPC6 for less than 30%.
