# Supplementary material
Source: PubMed Central journal article supplement (PMC6028632)
Supplement: 41422_2018_38_MOESM2_ESM.pdf [file 41422_2018_38_MOESM2_ESM.pdf]

**Table S2: Cryo-EM data collection, refinement and validation statistics**

|                                                     | <b>hTRPC6</b><br>(EMD-6856)<br>(PDB 5YX9) | <b>hTRPC3</b><br>(EMD-6911)<br>(PDB 5ZBG) |
|-----------------------------------------------------|-------------------------------------------|-------------------------------------------|
| <b>Data collection and processing</b>               |                                           |                                           |
| Magnification                                       | 37,500×                                   | 37,500×                                   |
| Voltage (kV)                                        | 300                                       | 300                                       |
| Electron exposure (e <sup>-</sup> /Å <sup>2</sup> ) | 50                                        | 50                                        |
| Defocus range (μm)                                  | -1.0 to -3.0                              | -1.0 to -3.0                              |
| Pixel size (Å)                                      | 1.33                                      | 1.37                                      |
| Symmetry imposed                                    | <i>C4</i>                                 | <i>C4</i>                                 |
| Initial particle images (no.)                       | 326,026                                   | 625,074                                   |
| Final particle images (no.)                         | 53,528                                    | 22,220                                    |
| Map resolution (Å)                                  | 3.8                                       | 4.4                                       |
| FSC threshold                                       | 0.143                                     | 0.143                                     |
| <b>Refinement</b>                                   |                                           |                                           |
| Model resolution (Å)                                | 3.8                                       | 4.4                                       |
| FSC threshold                                       | 0.143                                     | 0.143                                     |
| Model resolution range (Å)                          | 3.8                                       | 4.4                                       |
| Map sharpening <i>B</i> factor (Å <sup>2</sup> )    | -166.8                                    | -176.2                                    |
| Model composition                                   |                                           |                                           |
| Non-hydrogen atoms                                  | 21,348                                    | 21,276                                    |
| <i>B</i> factors (Å <sup>2</sup> )                  |                                           |                                           |
| Non-hydrogen atoms                                  | 146.94                                    | 214.84                                    |
| R.m.s. deviations                                   |                                           |                                           |
| Bond lengths (Å)                                    | 0.003                                     | 0.005                                     |
| Bond angles (°)                                     | 0.637                                     | 0.686                                     |
| Validation                                          |                                           |                                           |
| MolProbity score                                    | 2.11                                      | 2.38                                      |
| Clashscore                                          | 8.66                                      | 7.44                                      |
| Poor rotamers (%)                                   | 2.1                                       | 4.78                                      |
| Ramachandran plot                                   |                                           |                                           |
| Favored (%)                                         | 94.19                                     | 92.71                                     |
| Allowed (%)                                         | 5.66                                      | 6.99                                      |
| Disallowed (%)                                      | 0.15                                      | 0.30                                      |
