# Supplementary material
Source: PubMed Central journal article supplement (PMC6028632)
Supplement: 41422_2018_38_MOESM3_ESM.pdf [file 41422_2018_38_MOESM3_ESM.pdf]

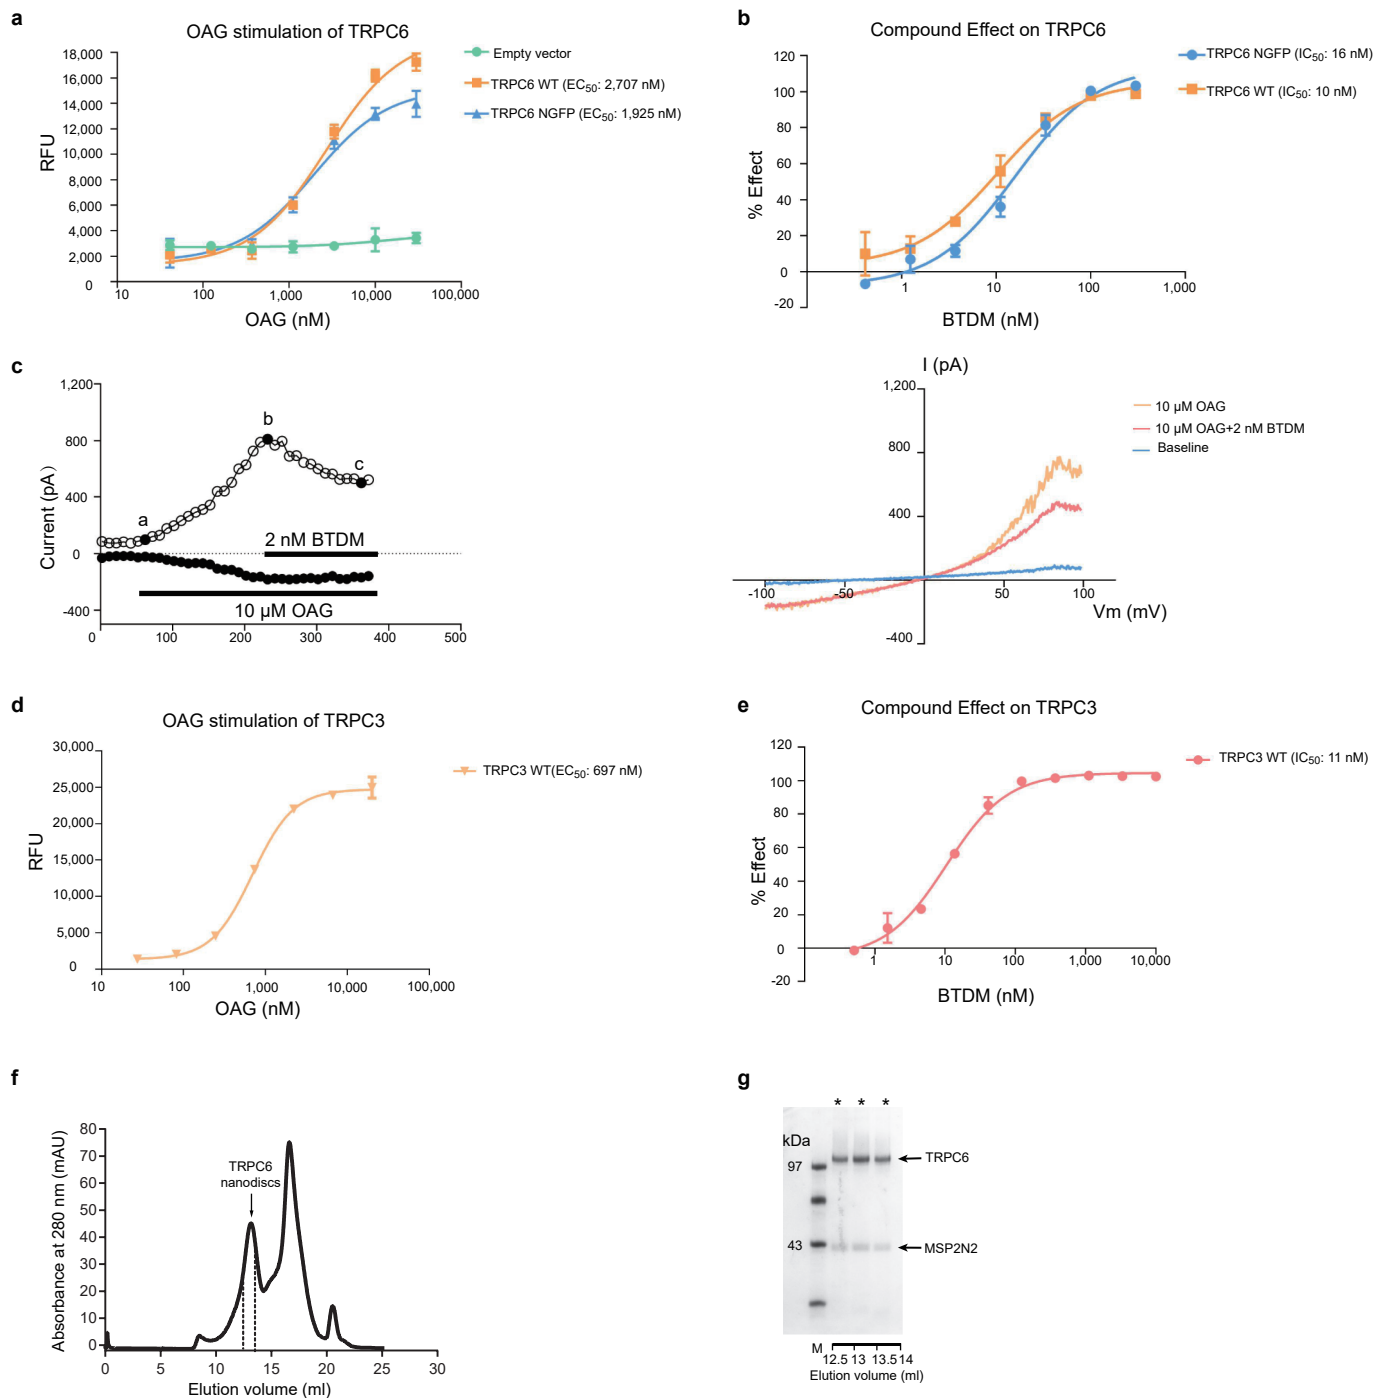

**Figure S1. Functional characterization of NGFP-hTRPC6 and hTRPC3 and purification of NGFP-hTRPC6.**

(a) Activation effect of OAG on NGFP-hTRPC6 constructs, measured by FLIPR membrane potential assay ( $n=3$ ). (b) Inhibition effect of the BTDM on NGFP-hTRPC6 constructs ( $n=3$ ). (c) Whole cell currents of hTRPC3 evoked by OAG were inhibited by BTDM in sub- $IC_{50}$  concentration. Solid and hollow circles represent currents at -100mV and +100mV respectively. (d) Activation effect of OAG on the non-tagged hTRPC3 construct ( $n=3$ ). (e) Inhibition effect of the BTDM on the non-tagged hTRPC3 construct ( $n=3$ ). (f) Representative size-exclusion chromatography of hTRPC6 reconstituted into nanodiscs. Fractions between dashed lines contain hTRPC6 in nanodiscs. (g) SDS-PAGE of size-exclusion chromatography peak fractions. Fractions denoted by asterisks were pooled for cryo-EM analysis.
