# Supplementary material
Source: PubMed Central journal article supplement (PMC6028632)
Supplement: 41422_2018_38_MOESM4_ESM.pdf [file 41422_2018_38_MOESM4_ESM.pdf]

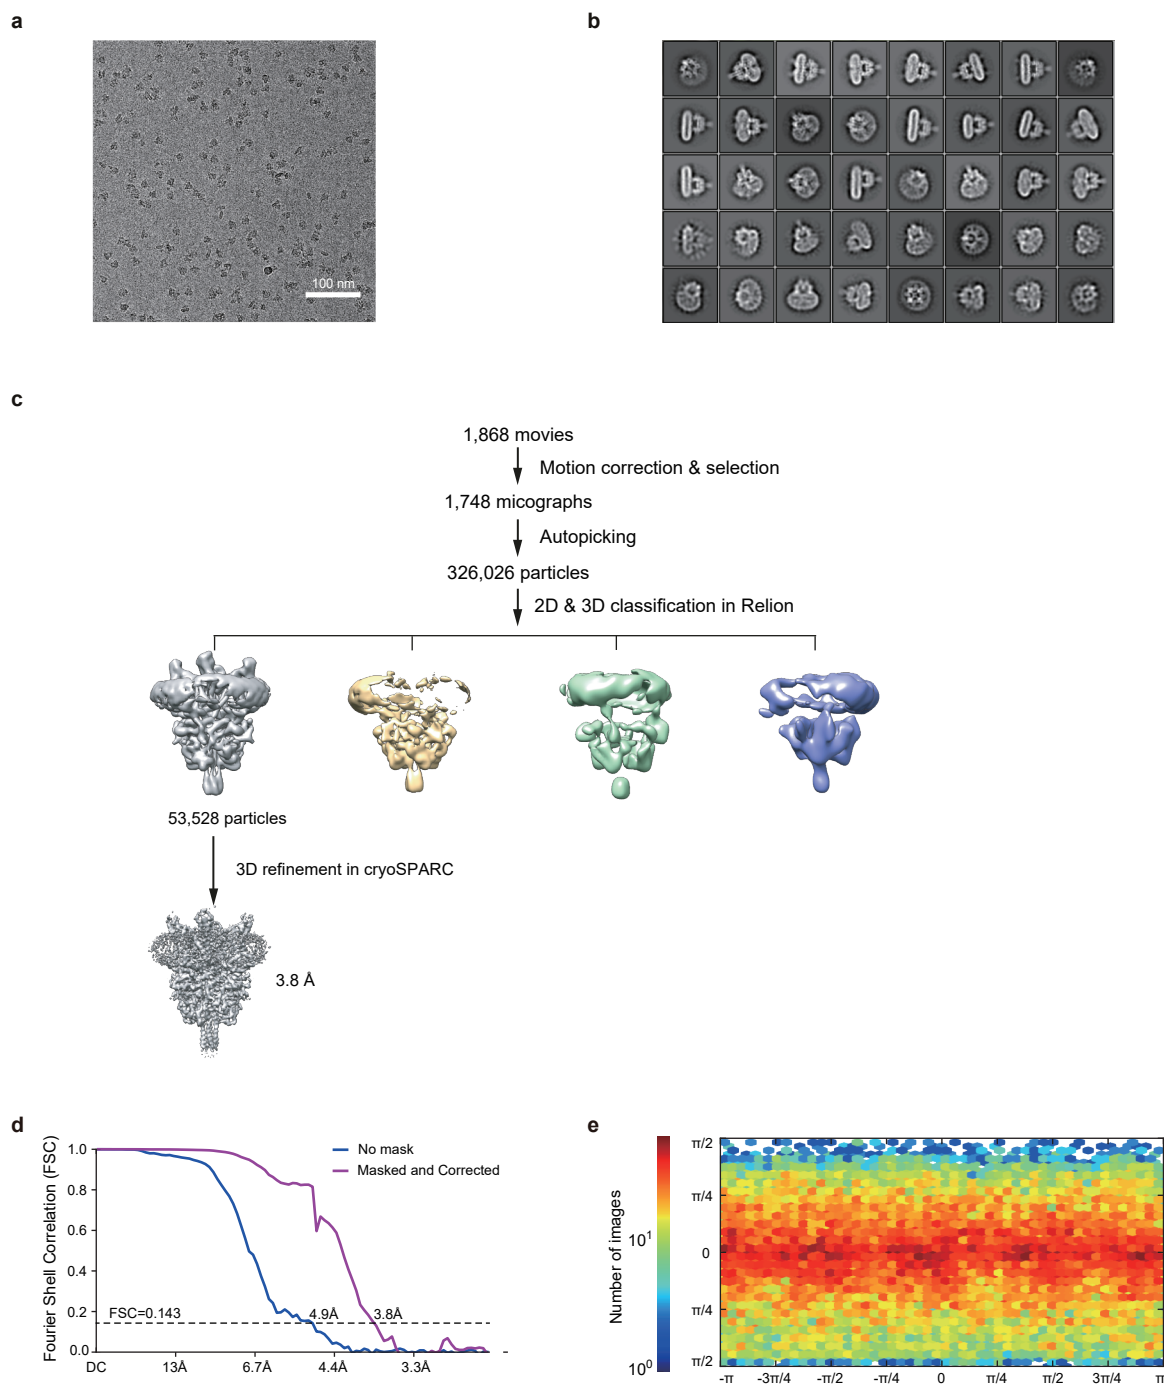

**Figure S2. Cryo-EM image analysis of the hTRPC6 channel in nanodiscs.**

(a) Representative raw micrograph of hTRPC6 nanodisc particles recorded on K2 Summit camera at a defocus of  $-2.0 \mu\text{m}$ . (b) Representative 2D class averages of hTRPC6 in nanodiscs. (c) Flowchart of hTRPC6 cryo-EM data processing. (d) FSC curves of the two independently refined maps for unmasked (blue line, 4.9 Å) and masked & corrected (purple line, 3.8 Å). Resolution estimation was based on the criterion of FSC 0.143 cut-off. (e) Angular distribution histogram of the final hTRPC6 reconstruction. This is a standard output from cryoSPARC.
