# Supplementary material
Source: PubMed Central journal article supplement (PMC6028632)
Supplement: 41422_2018_38_MOESM5_ESM.pdf [file 41422_2018_38_MOESM5_ESM.pdf]

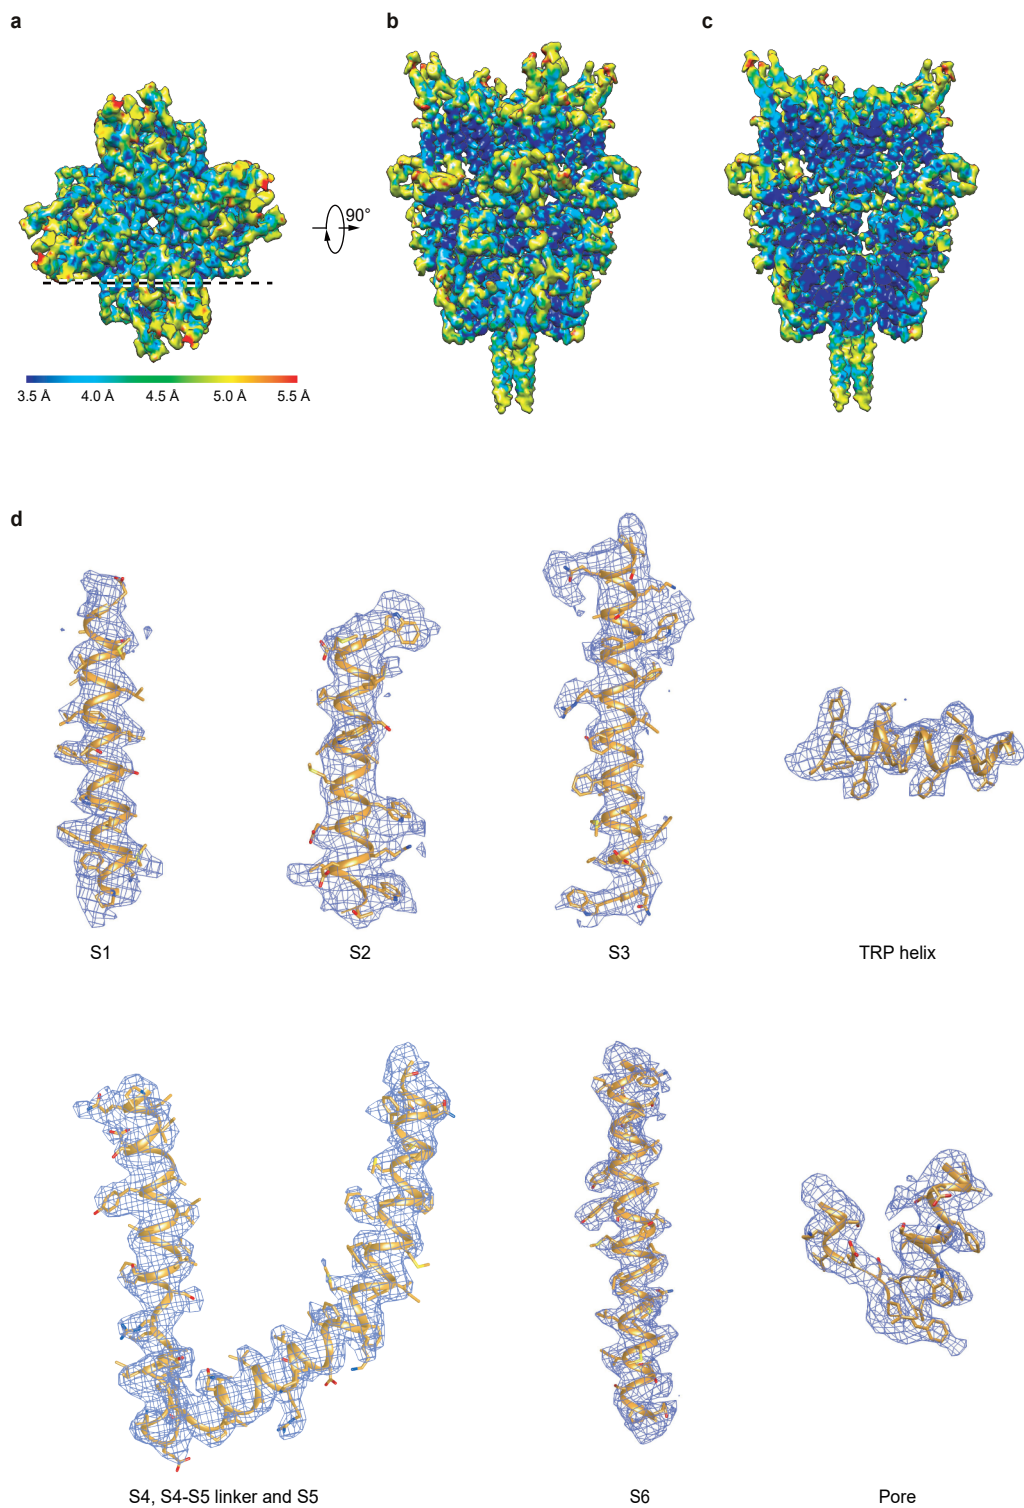

**Figure S3. Cryo-EM map of hTRPC6 in nanodiscs.**

(a-c) Top view (a), side view (b) and cross-section (c) of the final sharpened hTRPC6 cryo-EM density map colored by local resolution estimated by Resmap. A dashed line in (a) indicates the position of cross-section of (c). (d) Cryo-EM density map of representative transmembrane helices. The density maps in light blue mesh are superimposed with the hTRPC6 atomic model in orange.
