# Supplementary material
Source: PubMed Central journal article supplement (PMC6028632)
Supplement: 41422_2018_38_MOESM7_ESM.pdf [file 41422_2018_38_MOESM7_ESM.pdf]

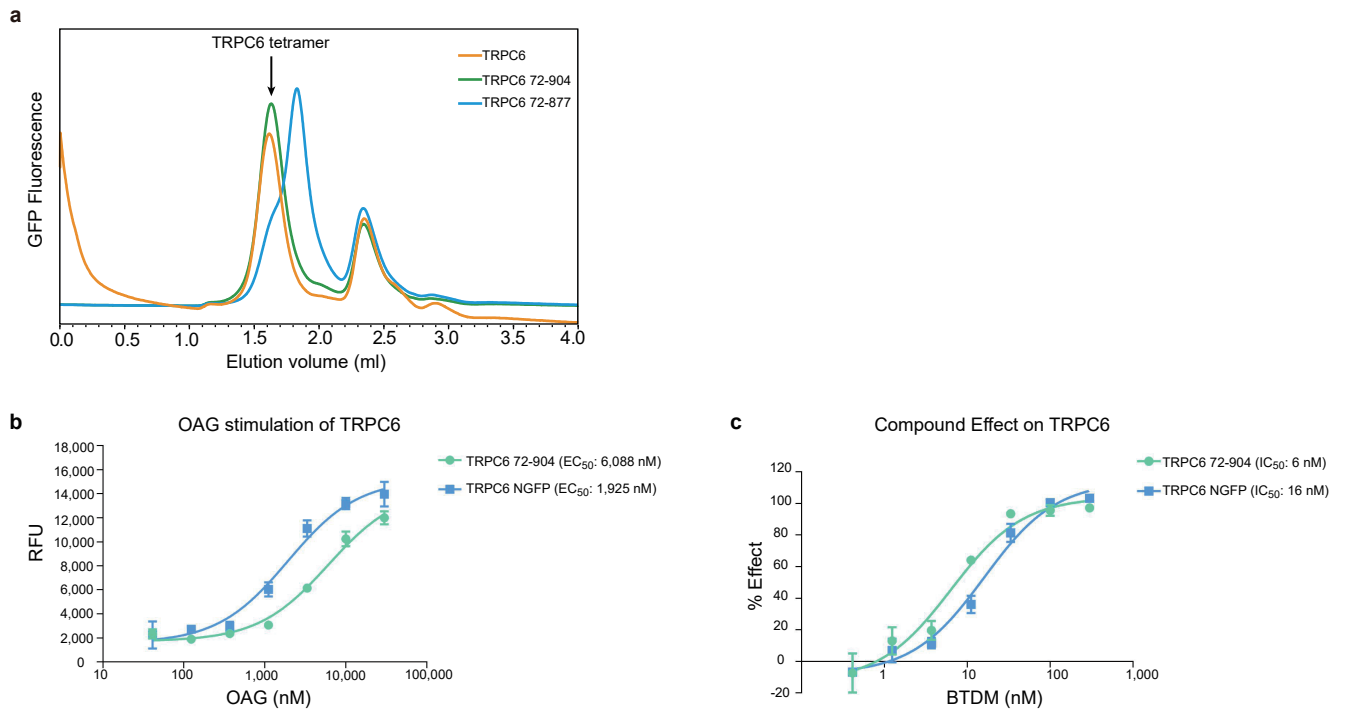

**Figure S5. Characterization of hTRPC6 truncation constructs.**

**(a)** FSEC profile of hTRPC6 truncation constructs. Arrow indicates the peak position corresponding to the tetrameric N-terminal GFP-tagged hTRPC6. **(b)** Activation effect of OAG on hTRPC6 72-904 construct, measured by FLIPR membrane potential assay (n=3). **(c)** Inhibition effect of the BTDM on hTRPC6 72-904 construct (n=3).
