# Supplementary material
Source: PubMed Central journal article supplement (PMC6028632)
Supplement: 41422_2018_38_MOESM8_ESM.pdf [file 41422_2018_38_MOESM8_ESM.pdf]

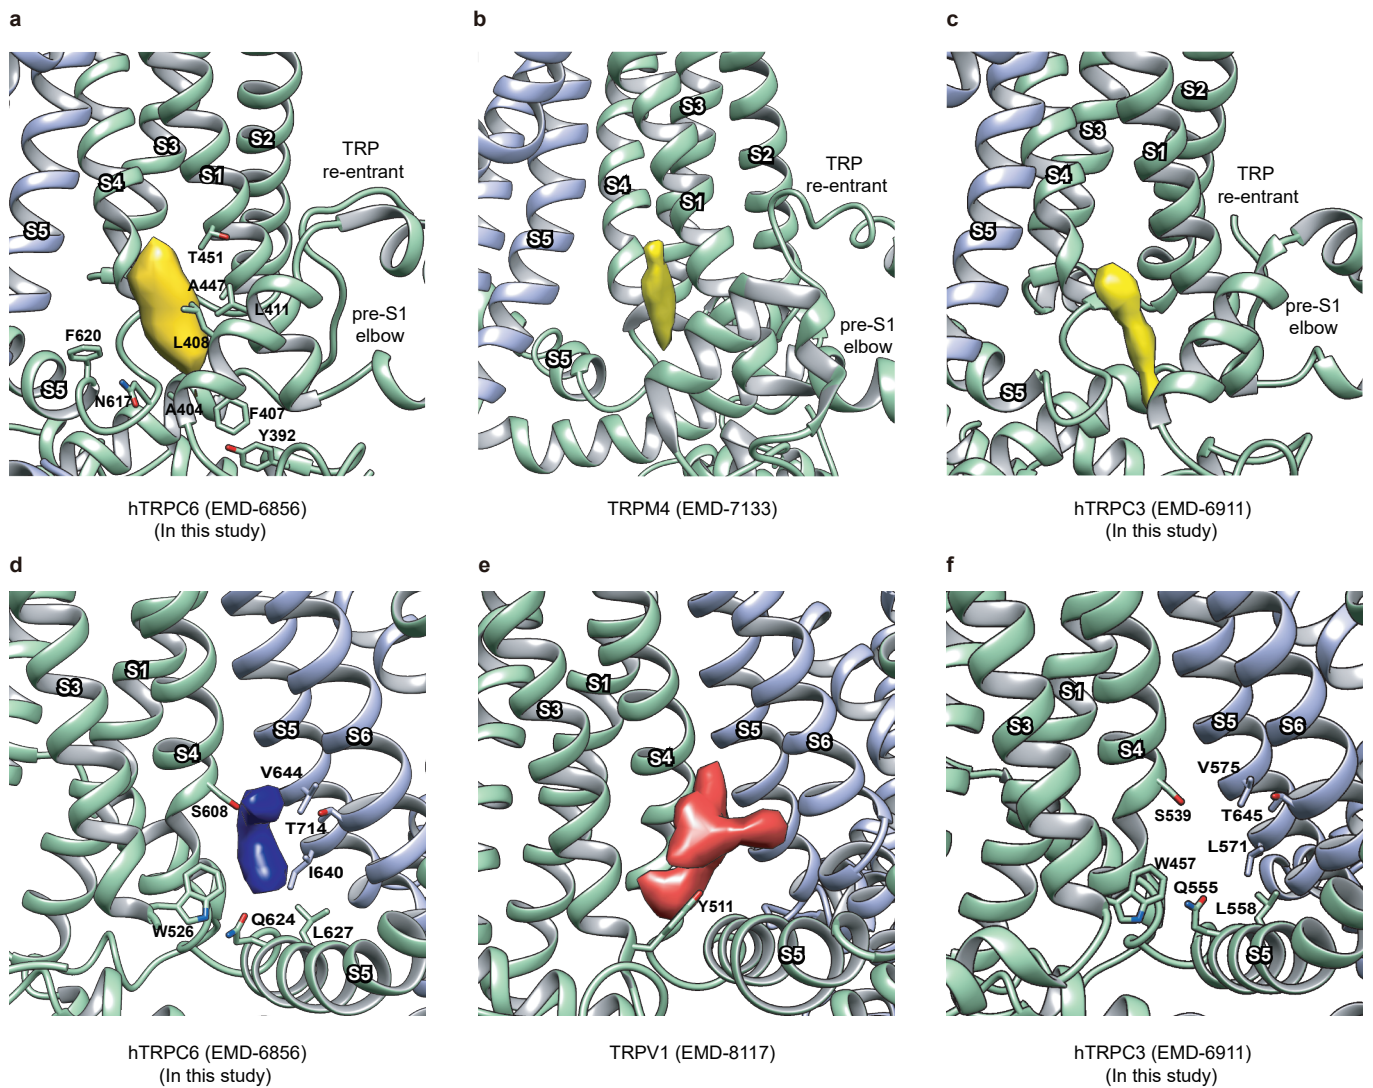

**Figure S6. Ligand densities in the cryo-EM map of hTRPC6.**

(a) The putative CHS density in hTRPC6 cryo-EM map is shown in yellow. Residues (Y392, A404, F407, L408, L411, A447, T451, N617, and F620) close to the density are shown as sticks. (b) The CHS density of TRPM4 (EMD-7133) shown in yellow is at the similar position to hTRPC6. (c) The putative CHS density of hTRPC3 (EMD-6911) shown in yellow is at the similar position to hTRPC6. (d) The BTDM density is colored in dark blue. The side chain of W526, S608, Q624, L627, I640, V644, and T714 close to the density are shown as sticks. (e) The density of TRPV1 activator RTX (EMD-8117) shown in red is at the similar position to BTDM of TRPC6 in panel (d). (f) The BTDM binding site in hTRPC3 map is devoid of strong density. The cryo-EM density map of hTRPC3 is contoured to the same level as in panel (d).
