# Supplementary material
Source: PubMed Central journal article supplement (PMC6028632)
Supplement: 41422_2018_38_MOESM9_ESM.pdf [file 41422_2018_38_MOESM9_ESM.pdf]

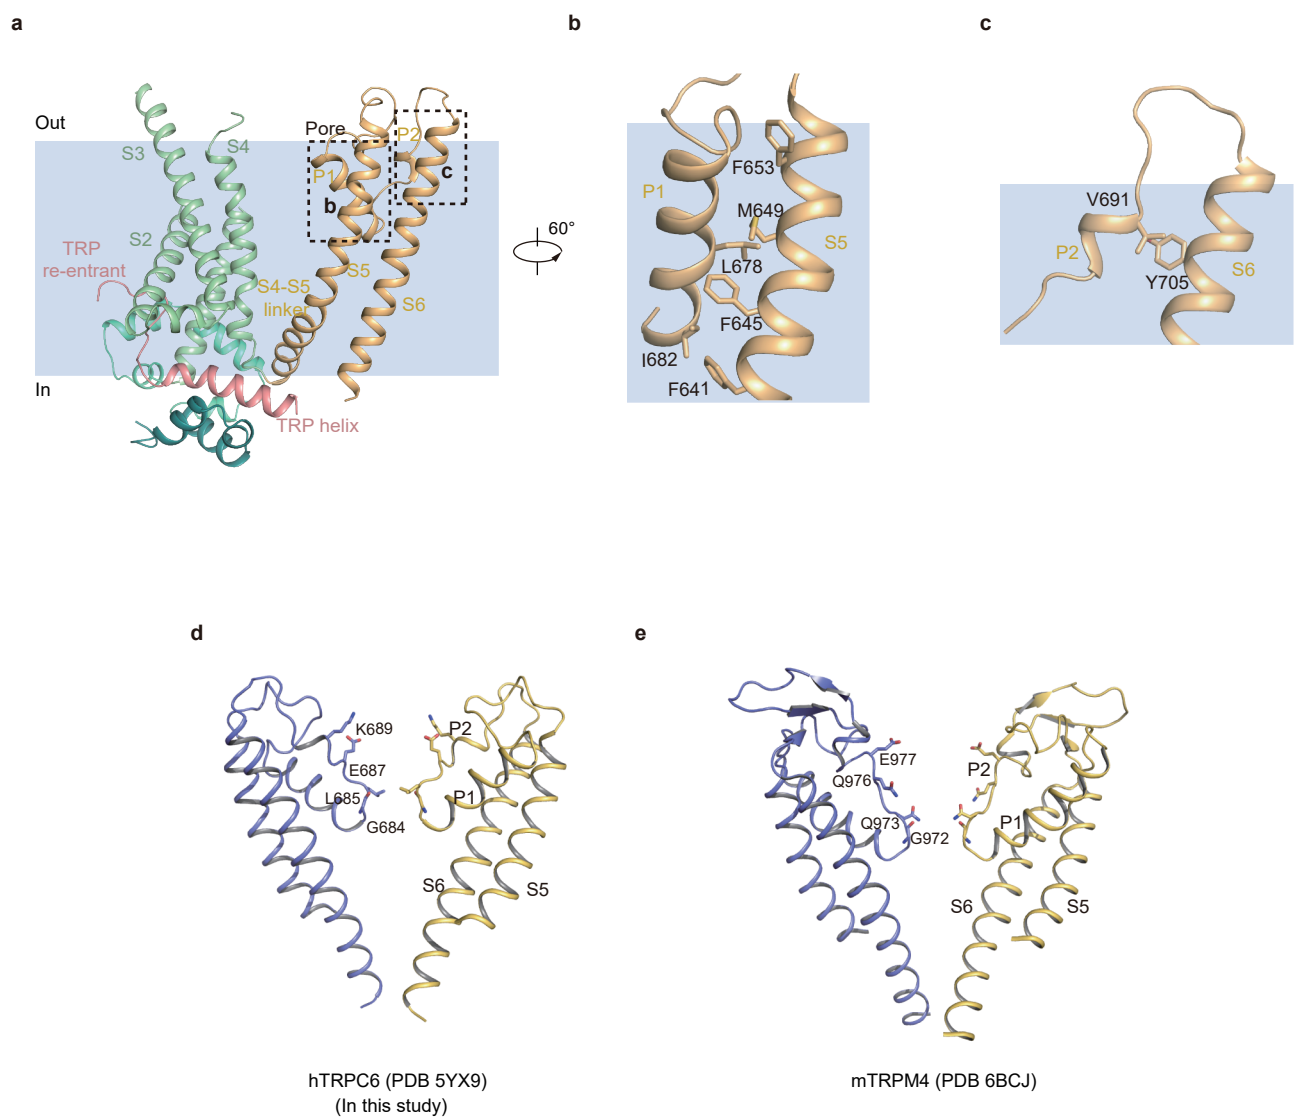

**Figure S7. hTRPC6 ion channel pore.**

(a) Side view of the TMD of one hTRPC6 subunit. Each structural element is colored the same as in Fig. 3. Putative position of membrane bilayer is shown in light blue. (b-c) Close up view of the intra-subunit interactions between pore helices, pore loops and S5, S6 boxed in (a). (d-e) The pores of hTRPC6 and mTRPM4 are presented in cartoon. Only two subunits are shown for clarity. The side chains of residues that contribute to the ion permeation pathway are shown in stick representation.
