# Supplementary material
Source: PubMed Central journal article supplement (PMC6028632)
Supplement: 41422_2018_38_MOESM10_ESM.pdf [file 41422_2018_38_MOESM10_ESM.pdf]

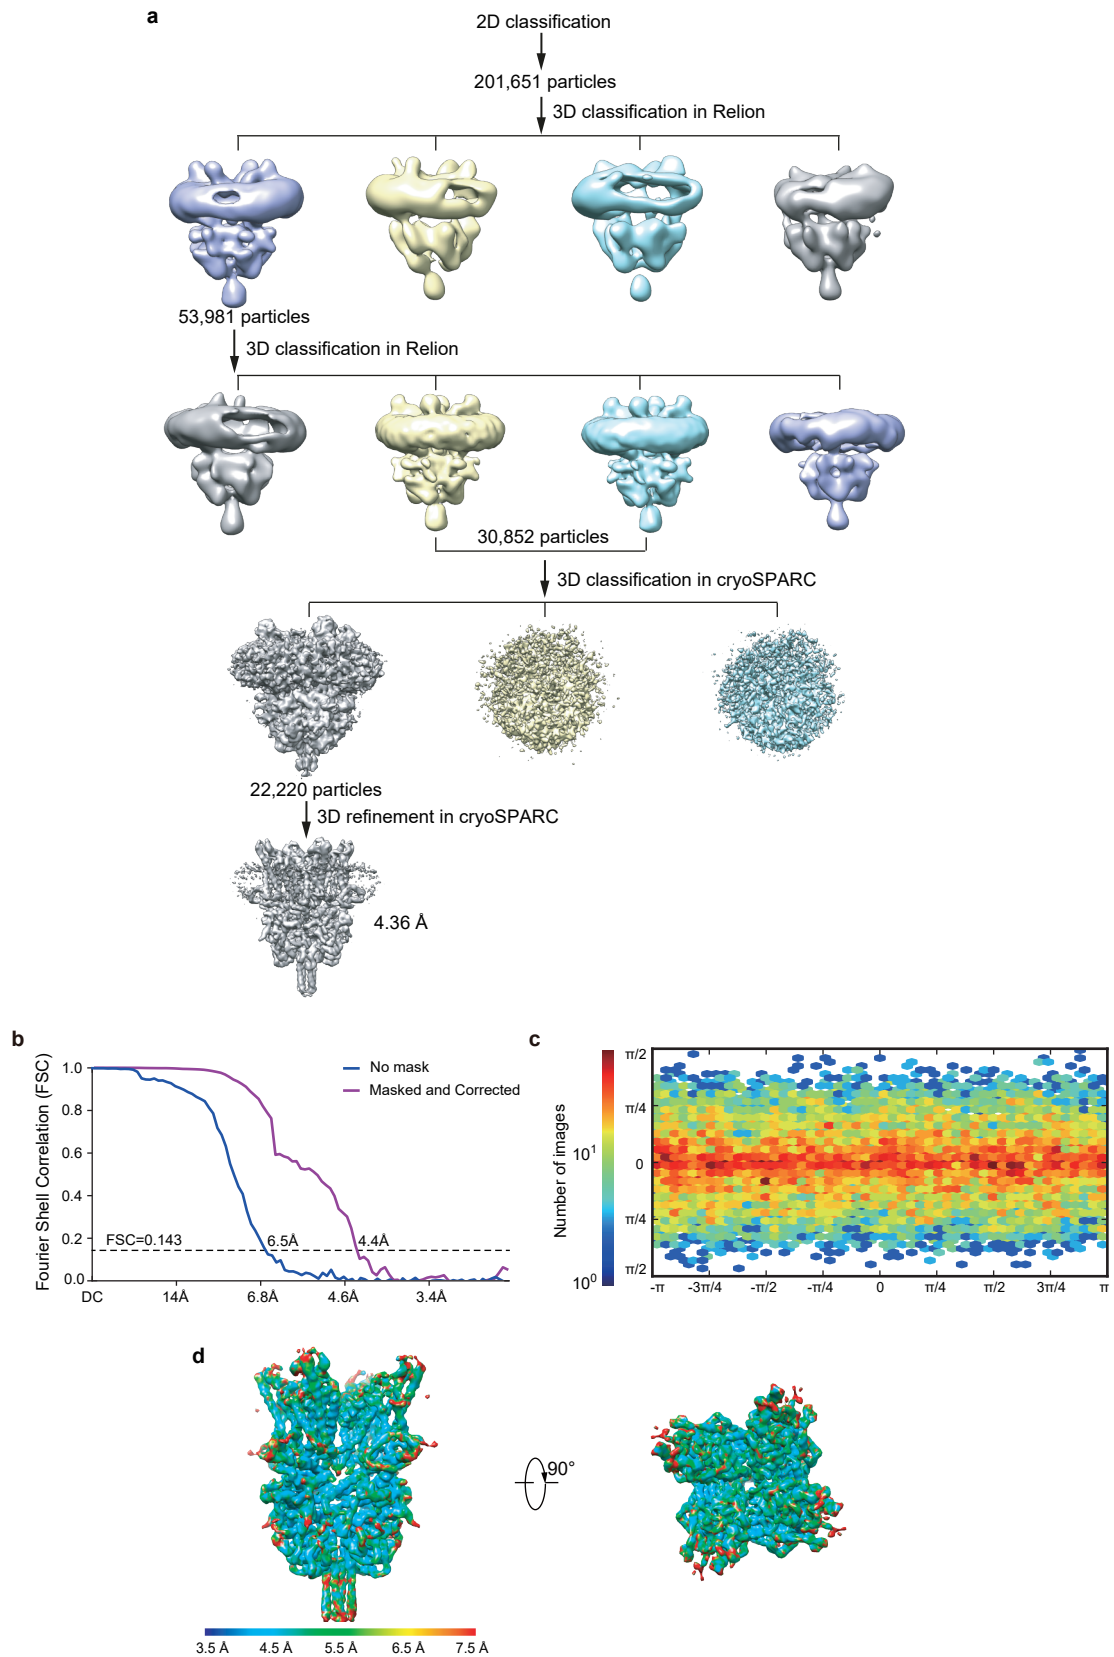

**Figure S8. Cryo-EM image analysis of the hTRPC3 channel in nanodiscs.**

**(a)** Flowchart of hTRPC3 cryo-EM data processing. **(b)** FSC curves of the two independently refined maps for unmasked (blue line, 6.5 Å) and masked & corrected (purple line, 4.4 Å). Resolution estimation was based on the criterion of FSC 0.143 cut-off. **(c)** Angular distribution histogram of the final hTRPC3 reconstruction. This is a standard output from cryoSPARC. **(d)** Side view and top view of the final hTRPC3 cryo-EM density map colored by local resolution estimated by Resmap.
